# Supplementary material for: Functional characterization of a new terpene synthase from Plectranthus amboinicus
Source: PubMed Central journal article supplement (PMC7332032; doi:10.1371/journal.pone.0235416), 2020-07-02
Supplement: pone.0235416.s001.pdf [file pone.0235416.s001.pdf]

| <b>Genes</b>   | <b>Sequences</b>         | <b>T<sub>m</sub> (°C)</b> | <b>Amplicon size (bp)</b> |
|----------------|--------------------------|---------------------------|---------------------------|
| <i>PamTps1</i> | F - GGAACAGCACCCCTTTGAGC | 63.80                     | 291                       |
|                | R - GAACAGCAACTCCGCCATC  | 63.89                     |                           |
| <i>APRT</i>    | F - TCCCACCCCTCAAAATCTGC | 59.96                     | 222                       |
|                | R - CGTCAGCATTGGAAGTTGCC | 60.11                     |                           |
| <i>TUB</i>     | F - GGCTCTGGTTTGGGGTCTTT | 60.18                     | 233                       |
|                | R - GTGGGCCTCTCAATGTCCAA | 59.96                     |                           |
| <i>EFG</i>     | F - GCCAGTTCGCCGATATCACT | 60.25                     | 178                       |
|                | R - CGAACGTCAACCACAGGGTA | 59.97                     |                           |
