# Supplementary material for: Functional characterization of a new terpene synthase from Plectranthus amboinicus
Source: PLOS journal article supplement (doi:10.1371/journal.pone.0235416), 2020-07-02
Supplement: S6 (10.1371/journal.pone.0235416.s006) [file journal.pone.0235416.s006]

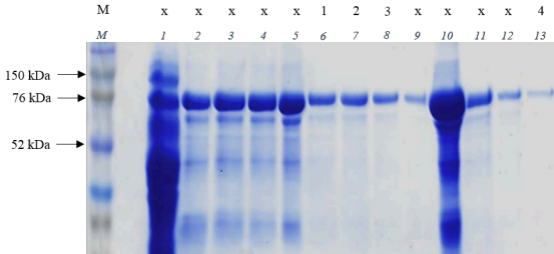

**Raw S1 Fig for SDS-PAGE profile**

**SDS-PAGE profile of *PamTps1* two-steps purification.** Lane M: Full-Range Rainbow™ molecular weight markers; lane 1: crude extract; lanes 2-9: IMAC fractions; lane 10: pooled and concentrated IMAC fractions; lanes 11-13: GF fractions.

Lanes label with x represent lanes not included in the final S1 Fig. The original lanes of M, 6-8 and 13 represent lanes M, 1-3 and 4 in the final S1 Fig, respectively.

ITEM D  
KODAK FILM D  
KODAK FILM D

|   |   |   |   |   |   |   |   |   |
|---|---|---|---|---|---|---|---|---|
|   |   |   |   | X | X | X | X | X |
| 1 | 2 | 3 | 4 | 5 | 6 | 7 | 8 | 9 |



**Raw S1 Fig for Western blot profile**

**Raw Western blot profile of *PamTps1*.** Lanes 1-3: *PamTps1* protein from IMAC fractions; lane 4: *PamTps1* from gel filtration fraction; lane 5: crude extract; lane 6: Total cell protein (TCP) induced at 24 h, lane 7: TCP induced at 6 h; lane 8: TCP induced at 4 h and lane 9: TCP induced at 2 h.

Lanes label with x represent lanes not included in the final S1 Fig. The lanes label as 1-4 are included in the final S1 Fig in the same arrangement.
